# Supplementary material for: Syphilis self-testing to expand test uptake among men who have sex with men: a theoretically informed mixed methods study in Zimbabwe
Source: HighWire-hosted journal article supplement (doi:10.1136/sextrans-2020-054911), 2021-04-29
Supplement: sextrans-2020-054911supp001_data_supplement.pdf [file sextrans-2020-054911supp001_data_supplement.pdf]

## Supplementary material

### Supplementary material 1 : Phase one in-depth interview guide for MSM

IDI Guide MSM\_Formative Work

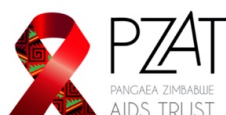

#### **In-depth Interview (IDI) Guide for Men having sex with men.**

#### **Syphilis Self-testing to expand test uptake among men who have sex with men (SST): A pilot RCT in Zimbabwe.**

##### **About this Study:**

You are invited to take part in a research study that will help us better understand whether syphilis self-testing might be a useful strategy for men having sex with men in Zimbabwe. Your participation in this project will allow us to develop better interventions to promote syphilis self-testing and linkage to care among men having sex with men across Zimbabwe.

##### **What's Involved?**

If you participate in this study, we will ask you some questions about your sociodemographic information and information about HIV/syphilis related sexual behavior and testing. Your information will all be recorded using an audio recorder and the audio will not have your name on it but a study number and you will not be identified in the interview.

##### **Study ID:**

## IDI Guide MSM\_Formative Work

**Objectives**

1. To understand experiences from those who have conducted HIVST.
2. To understand preferred distribution channels for SST.
3. To understand how MSM would want to access the SST.

**Warm-up, knowledge and attitudes for HIV self-testing (HIVST)**

1. Have you ever been tested for HIV? (Y/N)
  - a. What has been your experience with HIV testing?
2. Where have you used facility-based HIV testing services? (clinic, hospital, mobile clinic)
3. Are you aware of HIVST? (Y/N)
4. Can you tell us what you know about HIVST?
  - How did you learn about it? (who/where? Peer, community facilitator, facility)
  - Have you ever tested yourself for HIV? (Y/N)
  - Which test did you use? (blood based/ orasure?)
5. Have you ever used HIVST?
  - i. If yes,
    - When was the last time you did the HIVST?
    - Do you use it often?
    - How often do you use HIVST?
    - Did you prefer it to other forms of testing? Why?
  - ii. If no,
    - Why not?
    - Do you have any concerns with HIVST?

**Personal experiences with HIVST**

6. Can you describe in detail your first time using an HIVST?
  - a. How did you obtain it? (peers, community facilitators, facility)
  - b. Was this your first time testing for HIV?
    - i. If yes,
      - What barriers to facility based testing did HIVST overcome?
      - Did using an HIVST encourage you to later get facility based testing?
      - What was your motivation for taking an HIVST?
    - ii. If no,
      - Did HIVST encourage you to later get facility based testing?
  - c. What was the context? (Anyone forced you?), why (motivators), when, where
  - d. What was your initial reaction to the result? (anxious, sad, suicide)
  - e. How did you feel about the accuracy of the result? Do you trust it?
  - f. How did you feel about the process? Any difficulties?
  - g. Did you tell anyone of your result? (partner, peer, family, health care provider) –
  - h. Did you take the test with anyone or alone?
  - i. Did you receive any money for returning your result?
7. What motivated you to choose HIVST?
  - a. Facilitators? (convenience, privacy, autonomy)
  - b. Barriers? (cost, reliability/quality)
8. Concerns before/during/after? (stigma, confidentiality/protection of privacy)

## IDI Guide MSM\_Formative Work

9. In what way has HIVST affected your life? (increase test frequency, condom usage)

**Syphilis self-testing (SST)**

10. Have you ever used facility-based syphilis testing services?
- Where have you used facility-based syphilis testing?
  - How often?
  - Have you ever tested positive to syphilis? When? Where?
11. Would you consider taking a syphilis self-test?
- If yes,
- Why? (Facilitators)
- If no,
- Why not? (Barriers)
- a. Where would you want to access the test? (home, facility, community based organization)
- b. How would you want to access the self-test? (alone, health care provider, peers, community facilitator, partner, family)
- c. Where would you want to take the test? (home, facility)
- d. Would you prefer it to facility based testing? Why?
12. Would you be able to tell anyone about your syphilis self-test result? (partners, friends, family)
13. Would you be able to send your results to a study staff member if you were to take the test at home using a smart phone?
- If yes,
- Why (have access to a smart phone, have phone credit)
- If no,
- Why not?
14. How serious a disease do you think syphilis is?
